# Supplementary material for: Proline-rich protein PRR19 functions with cyclin-like CNTD1 to promote meiotic crossing over in mouse
Source: PubMed Central journal article supplement (PMC7303132; doi:10.1038/s41467-020-16885-3), 2020-06-18
Supplement: 41467_2020_16885_MOESM1_ESM.pdf [file 41467_2020_16885_MOESM1_ESM.pdf]

Supplementary Information

Proline-rich protein PRR19 functions with cyclin-like  
CNTD1 to promote meiotic crossing over in mouse

Bondarieva A. et al.

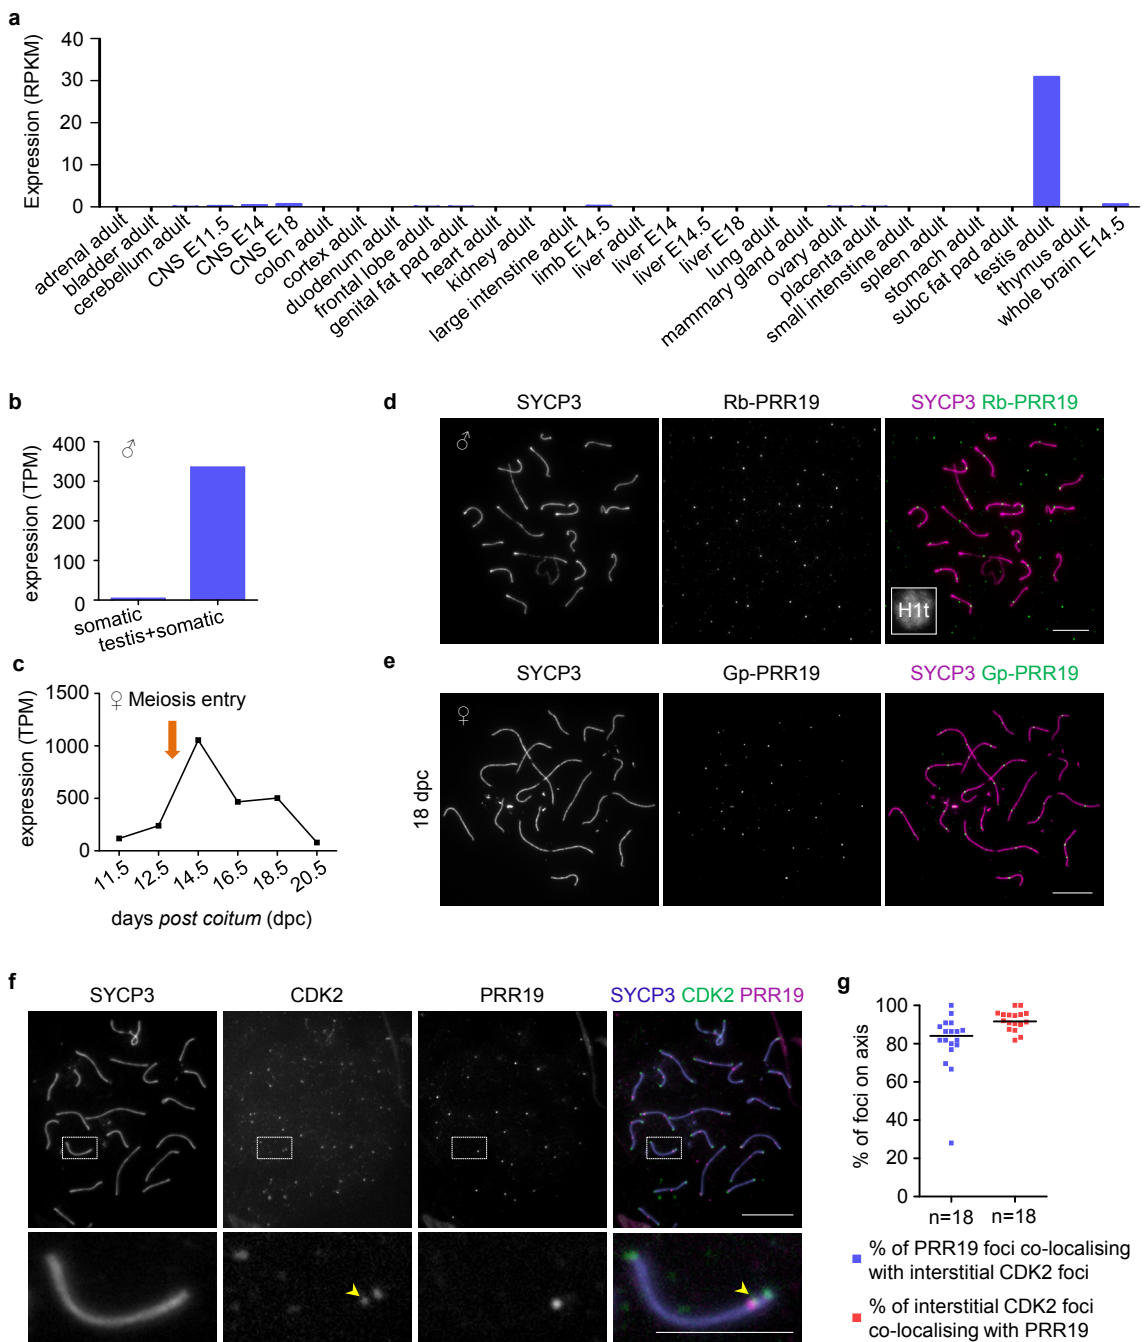

**Supplementary Figure 1. PRR19 localises to crossover-specific recombination complexes.**

(a) *Prr19* transcript levels are shown as reads per kilobase million (RPKM) in RNAs of indicated tissues from the ENCODE project (data source, BioProject: PRJNA66167; <https://www.ncbi.nlm.nih.gov/gene/623131/?report=expression>)<sup>25</sup>. (b-c) *Prr19* transcript levels are shown as transcripts per kilobase million (TPM) in (b) mixtures of equal quantities of total RNAs of 17 somatic tissues (somatic) or 17 somatic tissues plus adult testes (testis+somatic), or (c) total RNAs of foetal ovaries at the indicated developmental stages (data source, GSE119411, dataseries<sup>27</sup> from the Gene Expression Omnibus database, <https://www.ncbi.nlm.nih.gov/geo/query/acc.cgi?acc=GSE119411>) (a-c) Presented data come from a single experiment. (d-f) Indicated proteins were detected by immunofluorescence in nuclear spread (d, f) mid pachytene spermatocytes, or (e) pachytene oocytes from fetuses at 18 days *post coitum* (dpc). Enlarged insets (bottom panel, f) show co-localisation of PRR19 and crossover-specific CDK2 interstitial foci (marked by arrowhead). Bars, 10  $\mu$ m; on enlarged insets (f), 5  $\mu$ m. (g) Quantification of co-localisation between PRR19 and interstitial CDK2 foci on the chromosome axis in mid pachytene wild-type spermatocytes, medians (bars) are 84.1% (blue dataset) and 91.7% (red dataset). n=number of analysed cells from a single mouse. Source data are provided as a Source Data file.

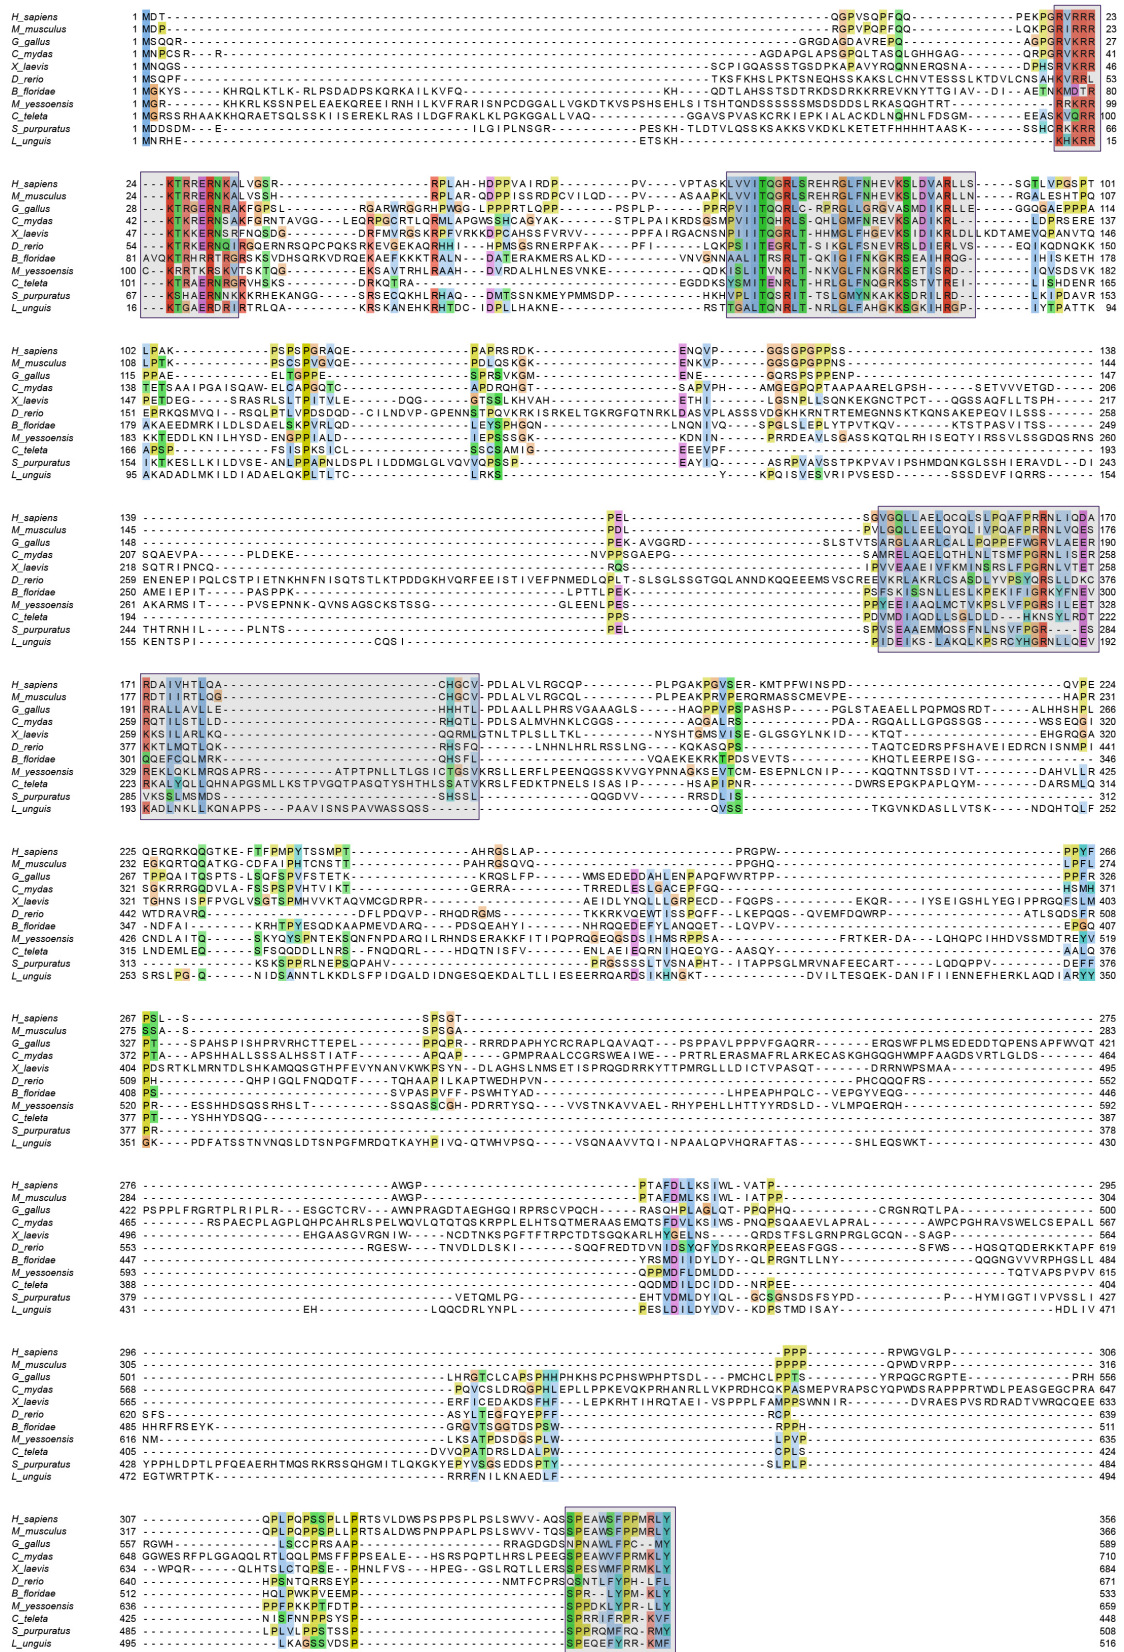

**Supplementary Figure 2. Multiple alignment of PRR19 protein sequences from various animal taxa.**  
Sequences are aligned from human (*H\_sapiens*), house mouse (*M\_musculus*), chicken (*G\_gallus*), green sea turtle (*C\_mydas*), african clawed frog (*X\_leavis*), zebrafish (*D\_riero*), lancelet (*B\_floridae*), scallop (*M\_yessoensis*), polychaete annelid worm (*C\_teleta*), purple sea urchin (*S\_purpuratus*), brachiopod (*L\_unguis*). Default ClustaX colour scheme was used. Boxes indicate four conserved motifs within PRR19 protein sequence. The conserved regions span R19-A32, L61-S91, V144-V191, S344-Y356 sequences in the human PRR19.





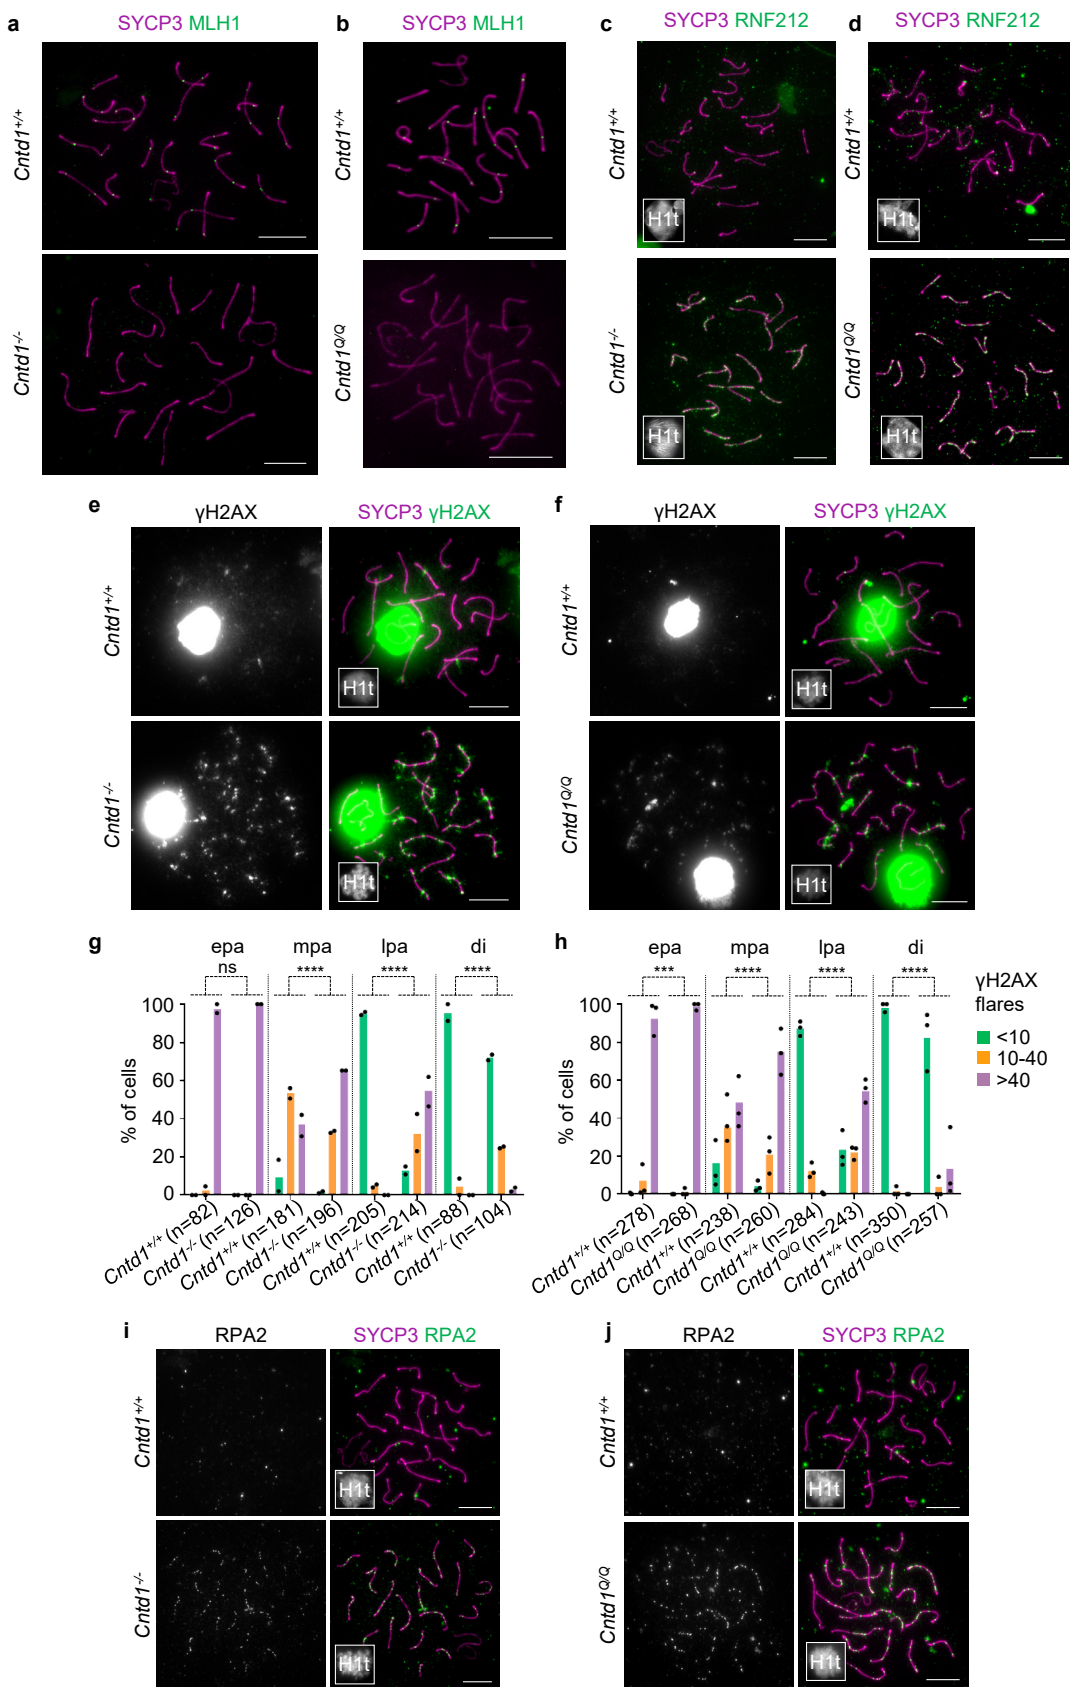

**Supplementary Figure 4. *Cntd1*<sup>-/-</sup> and *Cntd1*<sup>Q/Q</sup> spermatocytes show similar defects in DSB repair, crossover formation and RNF212 kinetics.**

(a-f, i-j) Indicated proteins were detected by immunofluorescence in nuclear surface-spread spermatocytes of wild-type, *Cntd1*<sup>-/-</sup> and *Cntd1*<sup>Q/Q</sup> mice; mid or late pachytene cells are shown. Miniaturised H1t signal of the corresponding cell is shown in the bottom left corner of images (c-f, i-j). Saturated  $\gamma$ H2AX signal (e-f) corresponds to the silenced chromatin of sex chromosomes, which is a chromatin compartment where histone  $\gamma$ H2AX hyper-accumulates in pachytene and diplotene stages. Bars, 10  $\mu$ m. (g-h) Quantification of  $\gamma$ H2AX flare numbers in early (epa), mid (mpa), late pachytene (lpa) and diplotene (di) spermatocytes. Three categories were distinguished, spermatocytes with less than 10 flares, between 10 and 40 flares and more than 40 flares of  $\gamma$ H2AX on autosomes. Graph shows datapoints and weighted averages of percentages of spermatocytes in the three categories, n=numbers of analysed cells from two (g) or three (h) experiments. An analysis of deviance using the likelihood-ratio test based on the chi-squared distribution was used to calculate if the proportions of cells with distinct numbers of  $\gamma$ H2AX flares significantly differ between wild type and *Cntd1*<sup>-/-</sup> (epa, P=0.1531, mpa, P=1.53E-08, lpa and di, P=2.20E-16) or *Cntd1*<sup>Q/Q</sup> (epa, P=0.0004531, mpa, P=4.36E-10, lpa, P=2.20E-16, di, P=3.02E-15). ns, \*\*\* and \*\*\*\* indicate no significance (P>0.05), 0.001>P>0.0001 and P<0.0001, respectively. Source data are provided as a Source Data file.

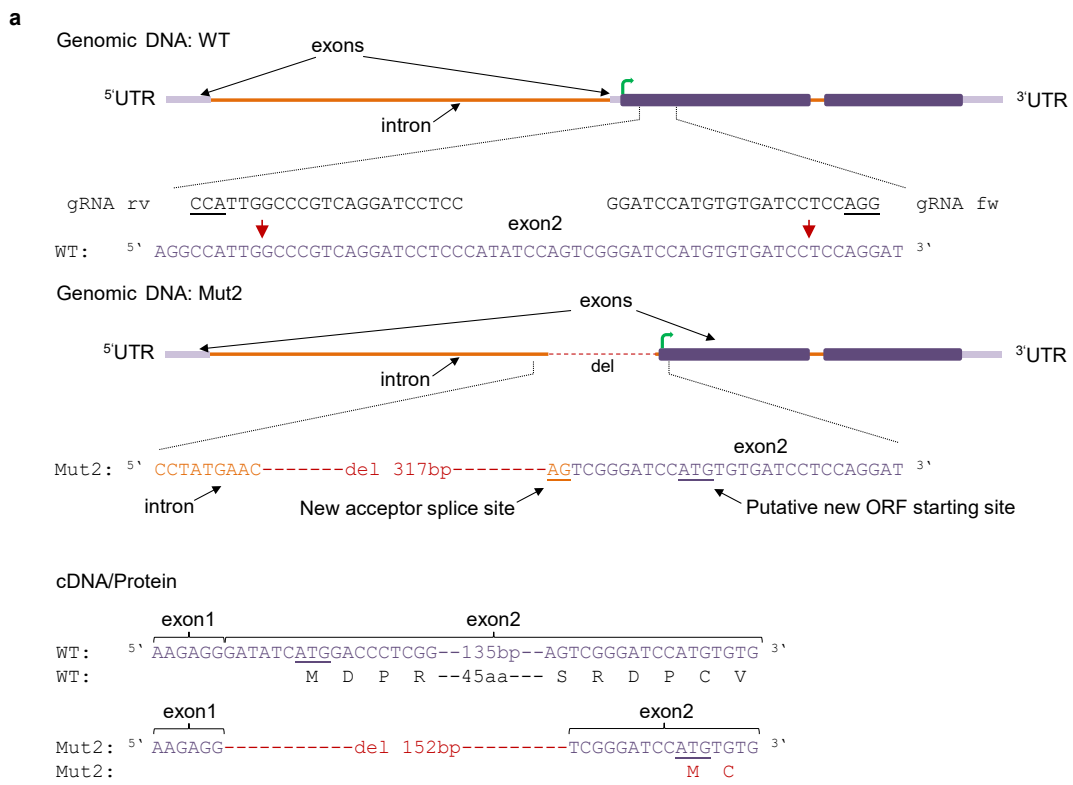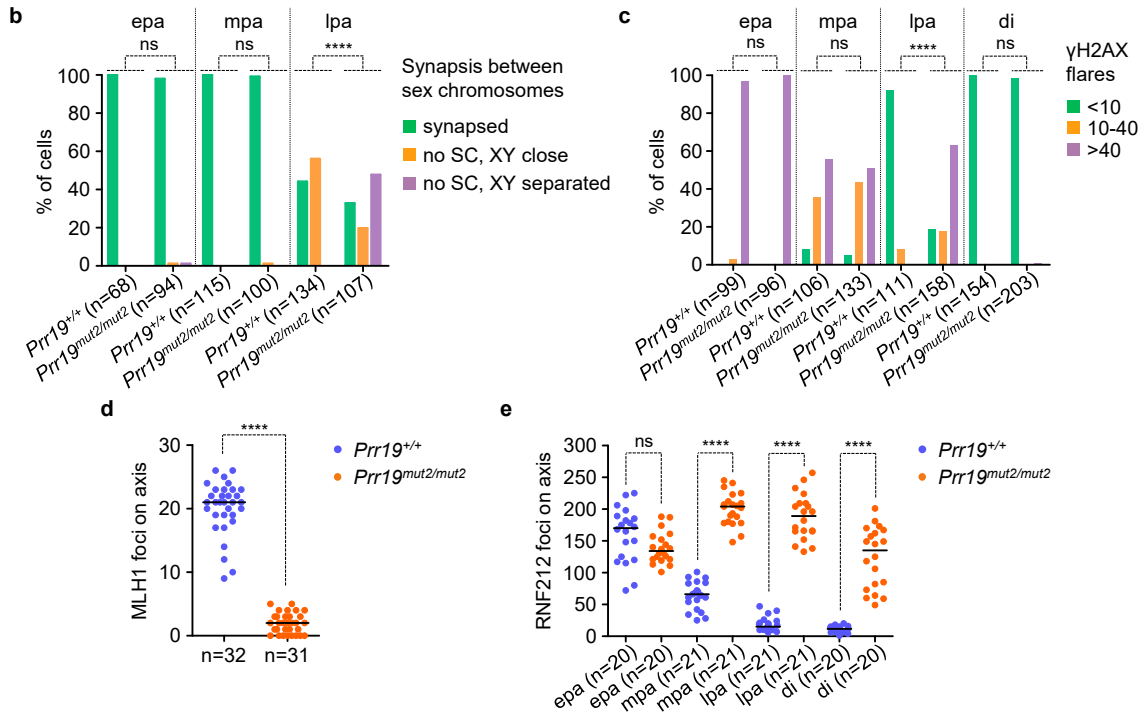

**Supplementary Figure 5. *Prr19* Mut2 spermatocytes are defective in DSB repair and crossover differentiation.**

(a) Schematics of the *Prr19* locus in wild-type or Mut2 mice. Schematics show introns (orange), exonic translated regions (dark lilac boxes), exonic untranslated regions (5' and 3'-UTR, light lilac boxes), deleted region (red dashes) and the start of open reading frame (ORF, green arrow) in exon 2. Expanded view of exon 2 from wild-type locus shows guide RNA sequences (gRNA rv and gRNA fw with PAMs underlined) and the sites (red arrows) that were cut by Cas9 nickase. Expanded view of the modified genomic region of *Prr19* Mut2 allele shows the intron and exon sequences flanking an 317 bp deletion; a new acceptor splice site that emerge in exon 2 due to the 317 bp deletion is underlined (orange), the first ATG codon that is expected to serve as a new out of frame ORF start site is also underlined (lilac). *Prr19* cDNAs of wild-type and Mut2 mice are shown with the corresponding protein sequences underneath. Start codons of ORFs are underlined in cDNAs. (b) Quantification of synapsis between sex chromosomes in wild-type and *Prr19*<sup>mut2/mut2</sup> spermatocytes. Pachytene spermatocytes were sub-staged to early (epa), mid (mpa) and late pachytene (lpa) based on histone H1t staining. Synapsis marker SYCP1 was detected and fractions of cells with distinct degrees of synapsis and pairing between sex chromosomes were quantified. Graph shows fractions of spermatocytes with synapsed sex chromosomes, unsynapsed but closely paired sex chromosomes (no SC, XY close) or unsynapsed sex chromosomes that separated (no SC, XY separated). (c) Quantification of gammaH2AX flare numbers in early (epa), mid (mpa), late pachytene (lpa) and diplotene (di) spermatocytes. Three categories were distinguished, spermatocytes with less than 10 flares, between 10 and 40 flares and more than 40 flares of gammaH2AX on autosomes. (b-c) Counted cell numbers (n) and percentages of cells from a single experiment are shown. Fisher's exact test, (b) epa, P=1, mpa, P=0.4651, lpa, P=2.2E-16, (c) epa, P=0.2463, mpa, P=0.382, lpa, P=2.2E-16, di, P=0.508; ns and \*\*\*\* indicate no significance and P<0.0001, respectively. (d) Quantification of axis-associated MLH1 foci in mid/late pachytene spermatocytes. (e) Quantification of RNF212 axis-associated focus numbers in early (epa), mid (mpa), late pachytene (lpa) and diplotene (di) spermatocytes. (d-e) n=numbers of analysed cells from a single experiment and medians (bars) are indicated. Median focus numbers (bars) were compared using Mann-Whitney U test and are as follows in wild-type and *Prr19*<sup>mut2/mut2</sup> cells: MLH1 foci, 21 and 2 (P=7.91E-12), RNF212 foci, in epa, 170 and 134 (P=0.06783), mpa, 66 and 204 (P=2.89E-08), lpa, 15 and 189 (P=4.26E-08), di, 11.5 and 135 (P=6.22E-08), respectively. ns and \*\*\*\* indicate P>0.05 and P<0.0001, respectively. Source data are provided as a Source Data file.

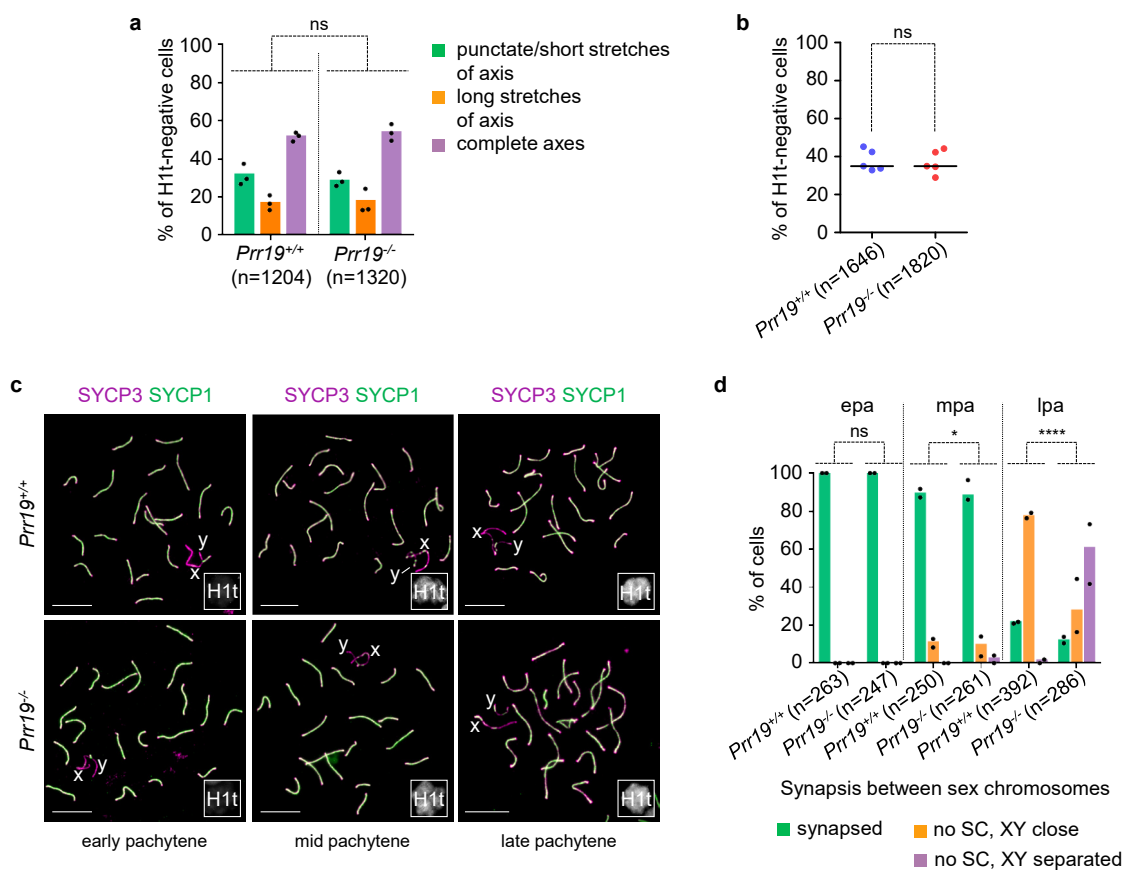

### Supplementary Figure 6. Synapsis of autosomes is efficient in PRR19-deficient spermatocytes.

(a) Quantification of testicular cell populations with distinct chromosome axis morphologies. SYCP3 (axis marker) and histone H1t were detected in testicular cells from adult mice. Graph shows the proportion of pre-mid pachytene (H1t-negative) spermatocytes that have focal SYCP3 staining or short stretches of axis (punctate/short stretches of axis, corresponds to preleptotene and leptotene, respectively), long stretches of axis (corresponds to early zygotene) or fully formed axes on all chromosomes (complete axes, corresponds to late zygotene and early pachytene). Counted cell numbers (n), datapoints and weighted averages of percentages from three experiments are shown. An analysis of deviance using the likelihood-ratio test based on the chi-squared distribution indicated no significant difference (ns,  $P=0.2236$ ). (b) Graph shows fraction of spermatocytes with fully synapsed autosomes in histone H1t-negative spermatocytes of adult wild-type and PRR19-deficient mice. Cell numbers (n) and medians (bars, 34.89% in both genotypes) from five experiments are shown. An analysis of deviance using the likelihood-ratio test based on the chi-squared distribution calculated no significant difference between wild type and *Prr19*<sup>-/-</sup> (ns,  $P=0.304$ ). (c) Immunofluorescence of synapsis (SYCP1), axis (SYCP3) and prophase staging (histone H1t) markers in nuclear spread spermatocytes of wild-type and *Prr19*<sup>-/-</sup> mice. Prophase stages and the X and Y chromosomes are indicated, miniaturised images of histone H1t are shown in insets. Bars, 10  $\mu\text{m}$ . (d) Quantification of synapsis between sex chromosomes in wild-type and *Prr19*<sup>-/-</sup> spermatocytes. Pachytene spermatocytes were sub-staged to early (epa), mid (mpa) and late pachytene (lpa) based on histone H1t staining. Synapsis marker SYCP1 was detected and fractions of cells with distinct degrees of synapsis and pairing between sex chromosomes were quantified. Graph shows fractions of spermatocytes with synapsed sex chromosomes, unsynapsed but closely paired sex chromosomes (no SC, XY close) or unsynapsed sex chromosomes that separated (no SC, XY separated). Counted cell numbers (n), datapoints and weighted averages of percentages from two experiments are shown. An analysis of deviance using the likelihood-ratio test based on the chi-squared distribution calculates no significant difference (ns,  $P=1$ ) in early pachytene, and significant differences in mid (\*,  $P=0.01603$ ) and late (\*\*\*\*,  $P=2.2\text{E-}16$ ) pachytene. Source data are provided as a Source Data file.

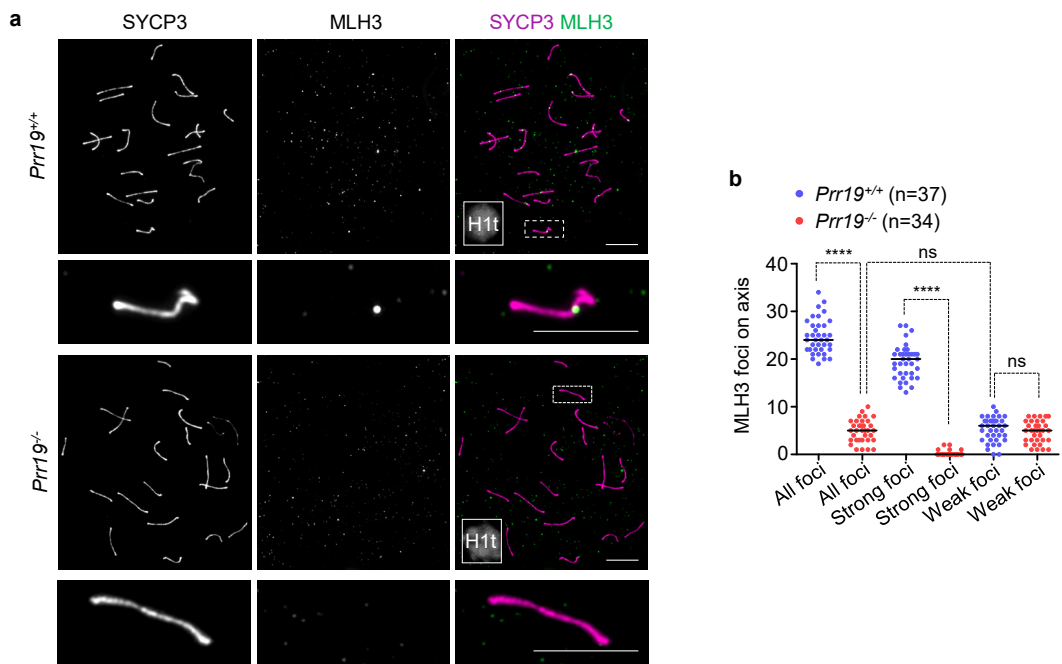

**Supplementary Figure 7. PRR19 is required for the formation of class I crossover-specific recombination complexes.**

(a) Class I crossover marker MLH3 was detected by immunofluorescence in spreads of mid pachytene spermatocytes from wild-type and *Prr19*<sup>-/-</sup> mice. Enlarged insets (bottom panels) show the presence or absence of a strong crossover-specific MLH3 focus on chromosomes in wild-type or *Prr19*<sup>-/-</sup> spermatocyte, respectively. Bars, 10  $\mu$ m. (b) Quantification of axis-associated foci of MLH3. Due to the high level of background staining, the strong focal staining of MLH3 was quantified separately from weak foci which were similar to non-axis-associated background foci in intensity. Counts of strong and weak foci are shown separately and pooled (all foci). n=numbers of analysed cells from two experiments. Medians (bars) were compared by Mann-Whitney U test and are as follows in wild type and *Prr19*<sup>-/-</sup>: all foci, 24 and 5 (\*\*\*\*,  $P=4.12E-13$ ), strong foci, 20 and 0 (\*\*\*\*,  $P=6.0E-14$ ), and weak foci, 6 and 5 (ns,  $P=0.3594$ ), respectively. Mann-Whitney U test calculated no significant difference between numbers of weak foci in wild type and total number of foci in *Prr19*<sup>-/-</sup> spermatocytes (ns,  $P=0.5161$ ). Source data are provided as a Source Data file.



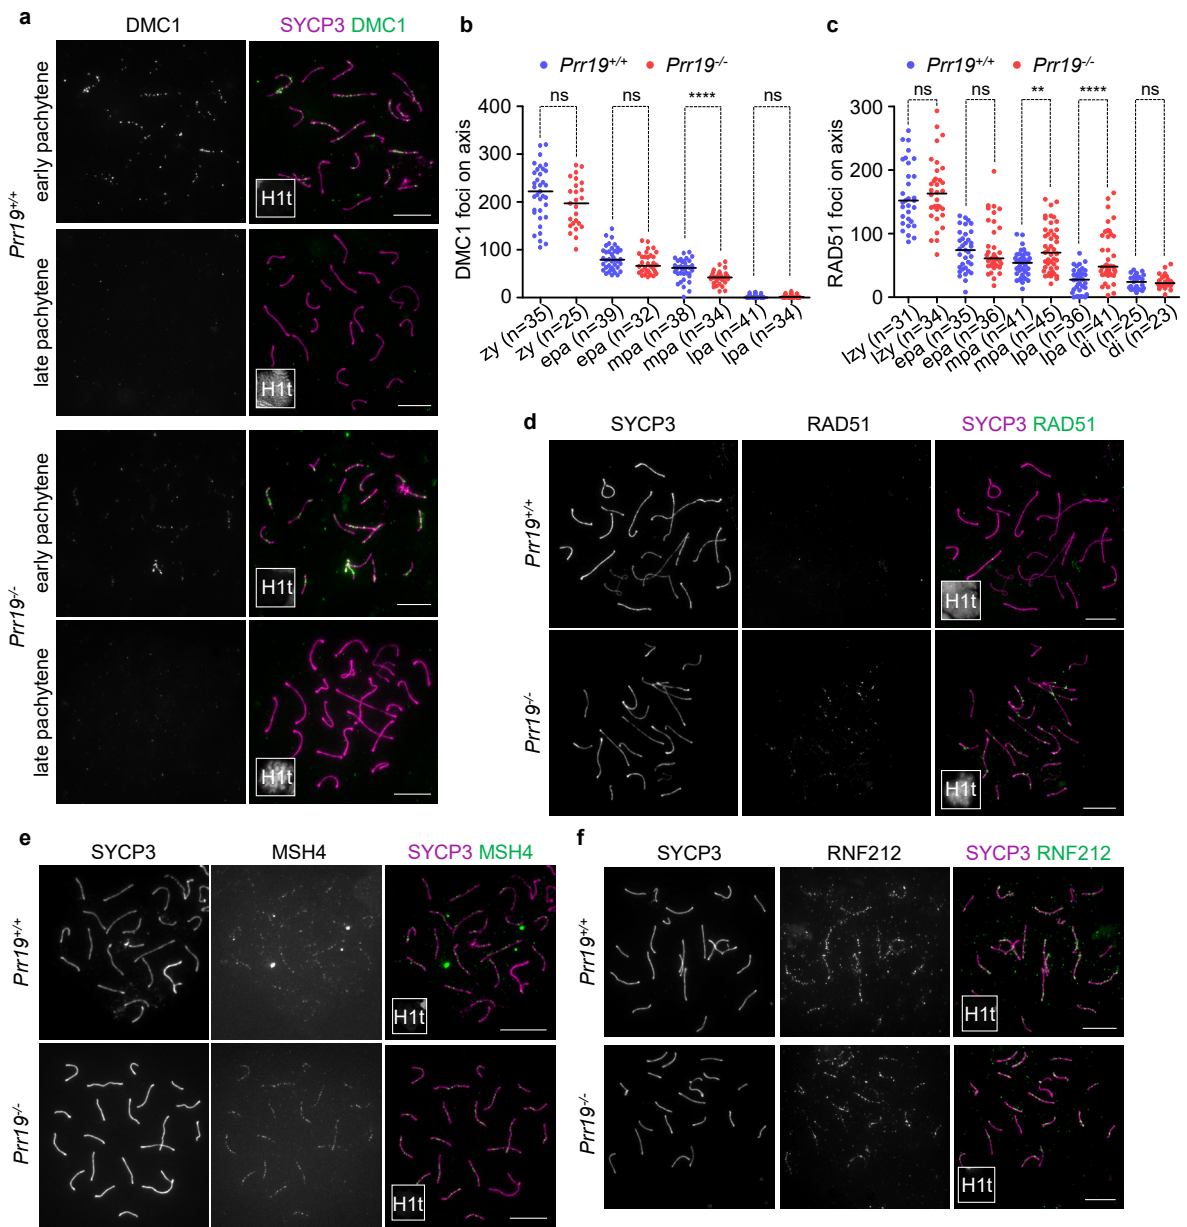

### Supplementary Figure 8. DSB repair is delayed in PRR19-deficient cells.

(a, d, e, f) Indicated proteins were detected by immunofluorescence in nuclear surface-spread spermatocytes. Miniaturised images of H1t signal are shown in the bottom left corner of overlay images. DMC1 (a) staining is shown in early and late pachytene cells; RAD51 (d) staining is shown in late pachytene cells. MSH4 (e) and RNF212 (f) are shown in early pachytene cells; for respective staining in late pachytene cells and quantification of MSH4 and RNF212 focus numbers refer to Fig. 5e-h. Bars, 10  $\mu$ m. (b-c) Quantification of DMC1 (b) and RAD51 (c) in mid/late zygotene (zy, for DMC1) or late zygotene (lzy, for RAD51), early (epa), mid (mpa), late pachytene (lpa) and diplotene (di) cells. Numbers of analysed cells (n) from two experiments and medians (bars) are indicated. Median focus numbers were compared using Mann-Whitney U test and are as follows in wild type and *Prr19*<sup>-/-</sup>: DMC1 in zy 222 and 197 (P=0.1086), epa 79 and 66.5 (P=0.07598), mpa 62 and 42 (P=6.46E-05), lpa 0 and 1.5 (P=0.2335), RAD51 in lzy 152 and 163 (P=0.6935), epa 74 and 61 (P=0.9267), mpa 54 and 70 (0.002266), lpa 27.5 and 48 (P=7.88E-06), di 24 and 22 (P=0.7101), respectively. ns, \*\* and \*\*\*\* indicate no significance (P>0.05), 0.01>P>0.001 and P<0.0001, respectively. Source data are provided as a Source Data file.

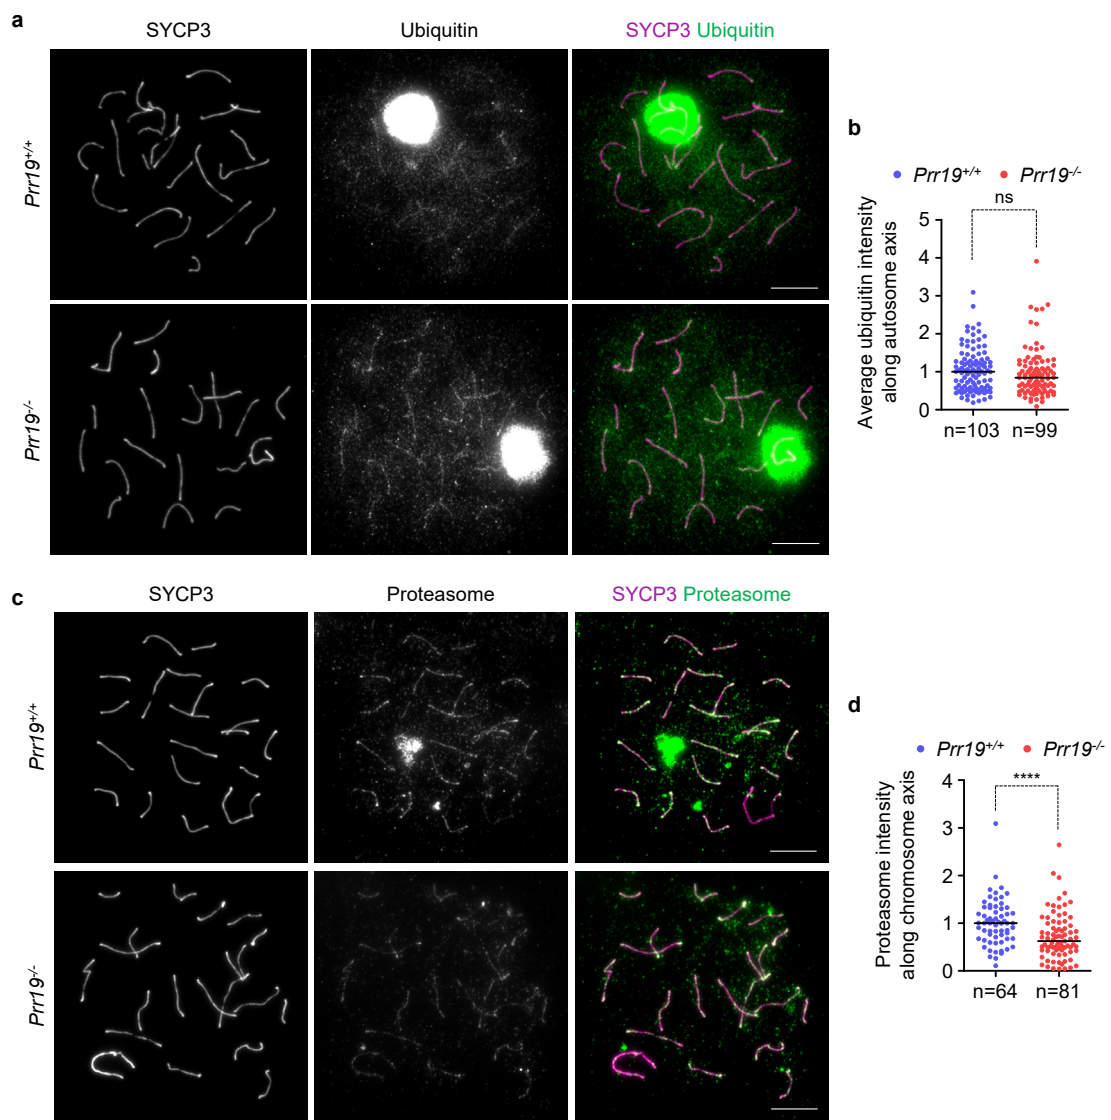

**Supplementary Figure 9. PRR19 is not required for ubiquitin and proteasome recruitment to the chromosome axis.**

(a, c) Mono- and polyubiquitynated conjugates (Ubiquitin, a), or proteasome 20S  $\alpha$ - and  $\beta$ -subunits (Proteasome, c) were detected by immunofluorescence in nuclear surface-spread pachytene spermatocytes. Saturated ubiquitin signal corresponds to the silenced chromatin of sex chromosomes (sex body), where ubiquitin localises in pachytene spermatocytes, as reported before. Bars, 10  $\mu$ m. (b, d) Ubiquitin (b) and proteasome (d) signal intensities were quantified along chromosome axes. (b) Only autosomes outside sex body were taken into account for ubiquitin signal quantification; average intensity per chromosome axis area was calculated. (d) The total signal along all chromosomes was used for proteasome intensity quantification. Graph shows pooled data from five and four experiments for ubiquitin and proteasome measurements, respectively. As absolute intensities of ubiquitin and proteasome varied between experiments, the values were normalised to the median of wild-type value within each experiment and normalised values were pooled together. Numbers of analysed cells (n) and medians (bars) are indicated. Mann-Whitney U test indicates no significant difference (ns,  $P=0.1311$ ) between medians of normalised ubiquitin levels in wild-type and *Prr19*<sup>-/-</sup> samples (1 and 0.84, respectively), and indicates significant difference (\*\*\*\*,  $P=8.08E-05$ ) between medians of normalised proteasome levels in wild-type and *Prr19*<sup>-/-</sup> samples (1 and 0.62, respectively). Source data are provided as a Source Data file.

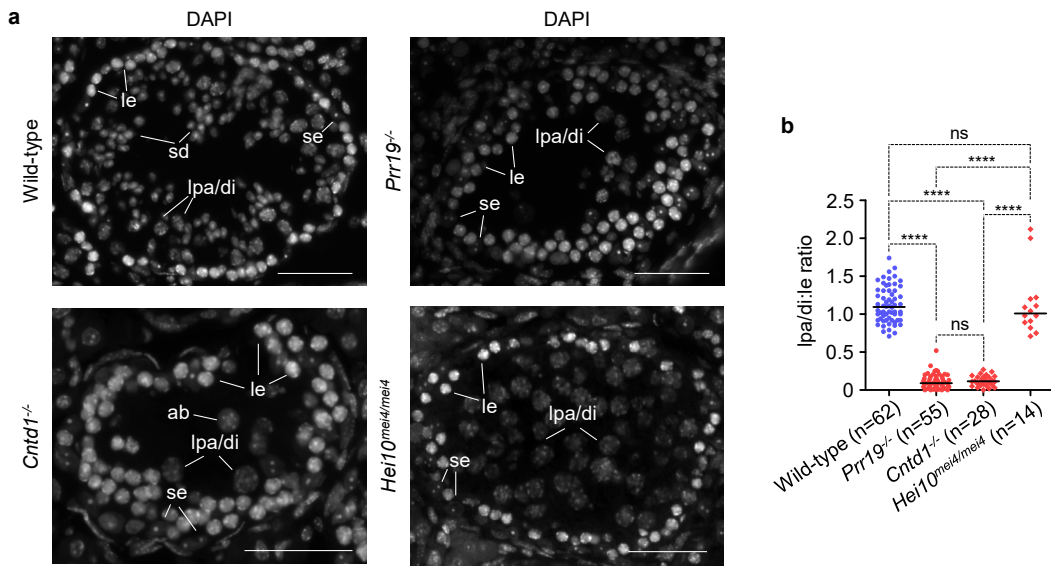

**Supplementary Figure 10. Meiotic arrest in *Prr19*<sup>-/-</sup> and *Cntd1*<sup>-/-</sup> testes is distinct from meiotic arrest in HEI10-deficient mice.**

(a) DAPI staining of DNA in testis sections from mice of indicated genotypes. Stage IX seminiferous tubules are shown. Sertoli cells (se), leptotene (le) and late pachytene/diplotene (lpa/di) spermatocytes, elongating spermatids (sd) and cells with abnormal nucleus morphology (ab) are marked. Bars, 50  $\mu$ m. (b) The ratios of late pachytene-diplotene to leptotene (lpa/di:le) spermatocyte numbers were quantified in stage IX seminiferous tubules in testis sections from adult wild-type mice and indicated mutants. Numbers of analysed tubules (n) and medians (bars) are indicated. Analysis from two *Cntd1*<sup>-/-</sup> and one *Hei10*<sup>mei4/mei4</sup> animals are shown. Quantifications of wild-type and *Prr19*<sup>-/-</sup> tubules are from Fig. 3e. Median ratios were as follows: 1.09 in wild type, 0.09 in *Prr19*<sup>-/-</sup>, 0.11 in *Cntd1*<sup>-/-</sup>, and 1.01 in *Hei10*<sup>mei4/mei4</sup>. Mann-Whitney U test, no significant differences (ns) between *Prr19*<sup>-/-</sup> and *Cntd1*<sup>-/-</sup> ( $P=0.3703$ ), and between wild type and *Hei10*<sup>mei4/mei4</sup> ( $P=0.338$ ), significant differences (\*\*\*\*) between wild type and *Cntd1*<sup>-/-</sup> ( $P=3.864E-14$ ), between *Prr19*<sup>-/-</sup> and *Hei10*<sup>mei4/mei4</sup> ( $P=9.15E-09$ ) and between *Cntd1*<sup>-/-</sup> and *Hei10*<sup>mei4/mei4</sup> ( $P=1.7E-07$ ). Source data are provided as a Source Data file.

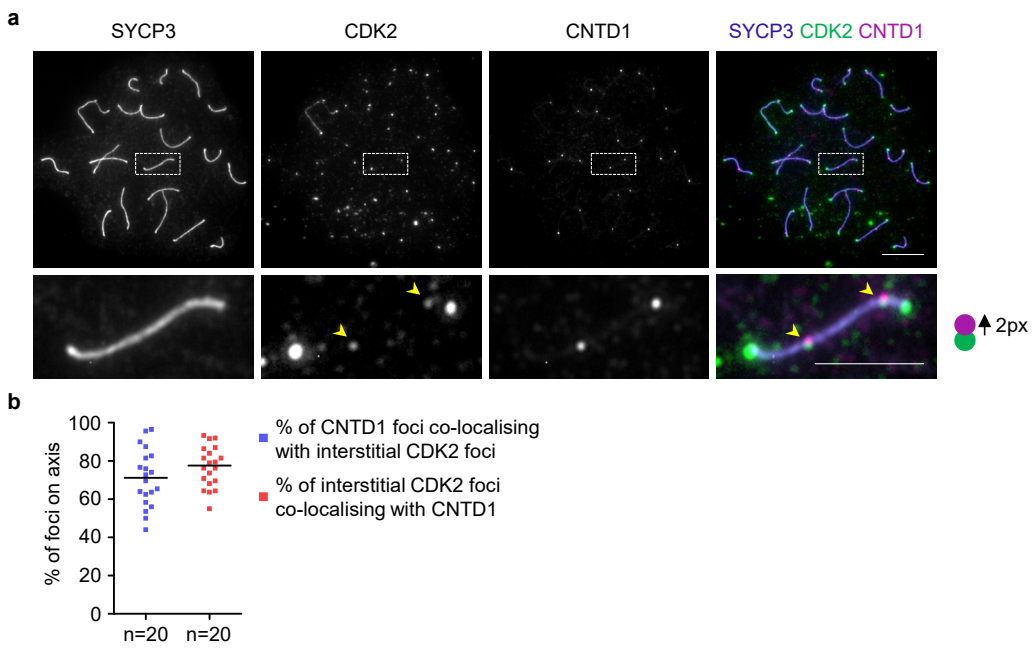

**Supplementary Figure 11. CNTD1 co-localises with crossover-specific CDK2 foci.**

(a) Indicated proteins were detected by immunofluorescence in nuclear spread mid pachytene spermatocytes. Enlarged insets (bottom panel) show co-localisation of CNTD1 and crossover-specific CDK2 interstitial foci (marked by arrowheads). CNTD1 signal is shifted by two pixels up for better visualisation of co-localisation. Bar, 10  $\mu\text{m}$ ; in enlarged inset, 5  $\mu\text{m}$ . (b) Quantification of co-localisation between CNTD1 and CDK2 foci on autosomal chromosome axes in mid pachytene wild-type spermatocytes, medians (bars) are 71.2% (blue dataset) and 77.6% (red dataset). Numbers of cells (n) from a single mouse are indicated. Source data are provided as a Source Data file.

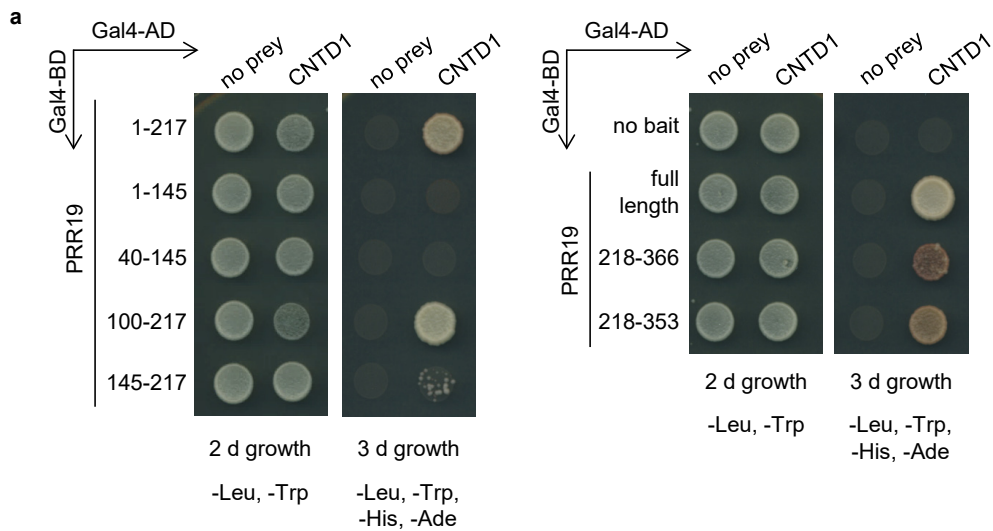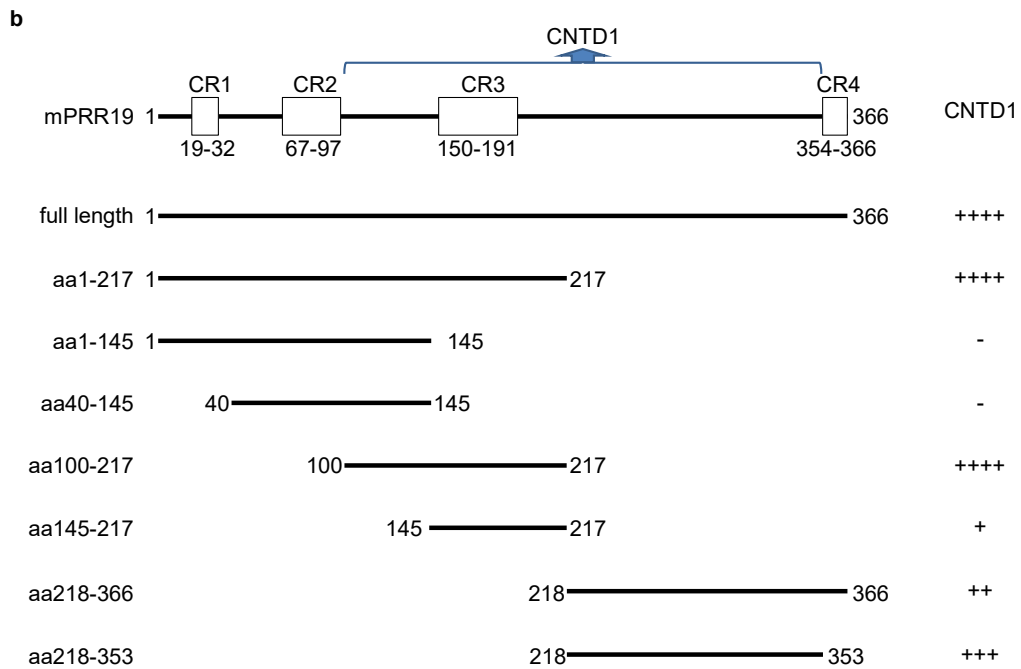

**Supplementary Figure 12. Y2H interactions of PRR19 fragments with CNTD1.**

(a) Y2H assays testing interactions between CNTD1 and fragments of PRR19 (amino acid positions of fragment ends are indicated). Yeast cell suspensions were plated onto dropout plates and imaged after 2 or 3 days of growth. As a negative control, interactions were tested between proteins of interest and either Gal4-binding (Gal4-BD) or Gal4-activation (Gal4-AD) domains that were not fused to bait (no bait) or prey (no prey) proteins, respectively. The two panels represent images of distinct sections of the same dropout plate. (b) Schematics of PRR19 domain structure and a summary of CNTD1 interactions with PRR19 fragments. Boxes mark the position of the four conserved regions (CR1-4) that are also indicated in Fig. S2. Numbers represent amino acid positions. The region that appears important for interaction with CNTD1 is indicated. Lines below the schematics of PRR19 structure represent PRR19 fragments that were tested in Y2H for interaction with CNTD1. Strength of Y2H interactions is graded from no interaction (-) to very strong interaction (++++).



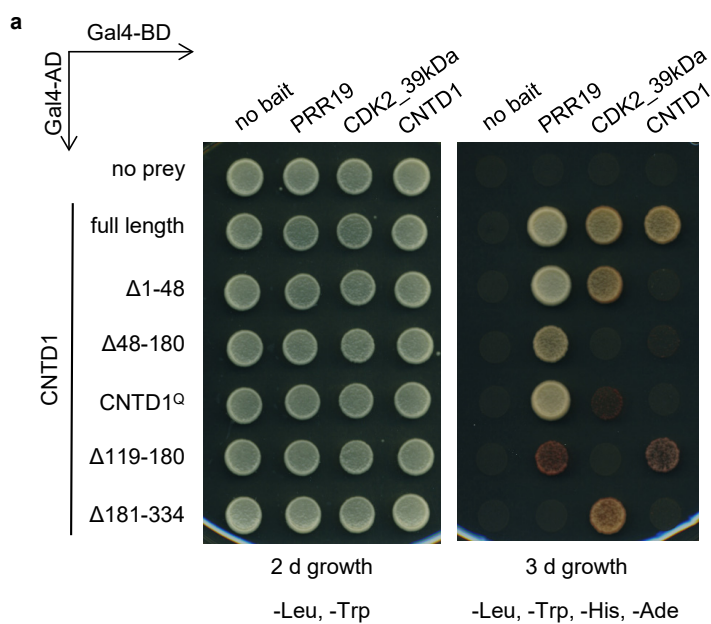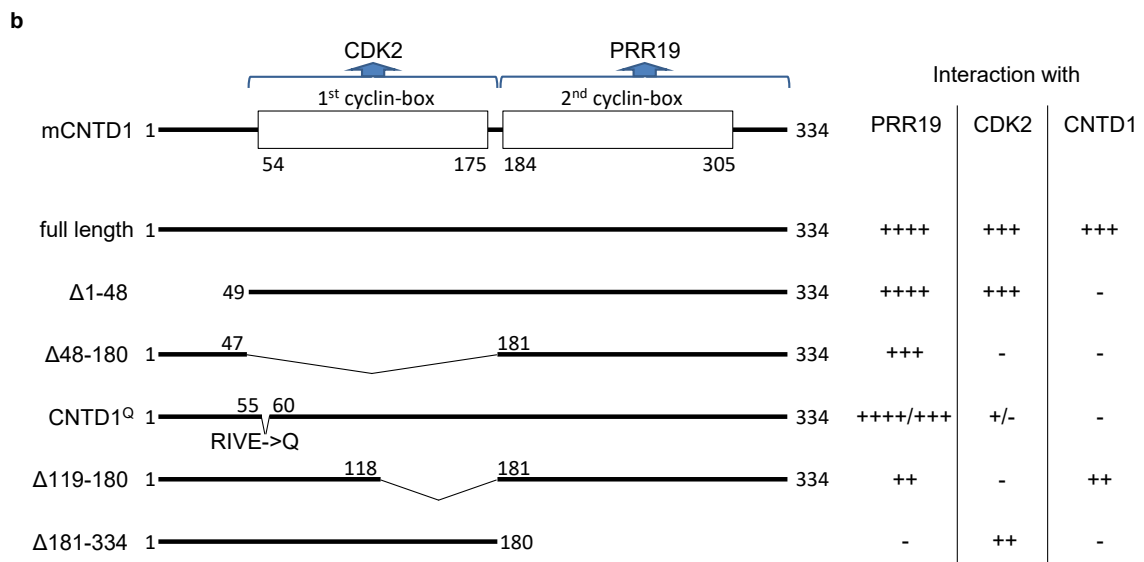

**Supplementary Figure 13. Y2H interactions of CNTD1 fragments with PRR19, CDK2 and full length CNTD1.**

(a) Y2H assays testing interactions between indicated proteins and CNTD1 fragments (amino acid positions of deleted fragment ends are indicated). Yeast cell suspensions were plated onto dropout plates and imaged after 2 or 3 days of growth. As a negative control, interactions were tested between proteins of interest and either Gal4-binding (Gal4-BD) or Gal4-activation (Gal4-AD) domains that were not fused to bait (no bait) or prey (no prey) proteins, respectively. (b) Schematics of CNTD1 domain structure based on CNTD1 alignment with cyclin A2 by SWISS-MODEL (<https://swissmodel.expasy.org/>). Boxes mark the position of the predicted first and second cyclin boxes. Numbers represent amino acid positions. The CNTD1 regions that appear important for interaction with PRR19 and CDK2 are indicated. Lines below the schematics of CNTD1 structure represent CNTD1 fragments that were tested in Y2H for interaction with PRR19, CDK2 and full length CNTD1 as shown in a and Fig. 7i. Strength of Y2H interactions is graded from no interaction (-) to very strong interaction (++++), (+/-) indicates a very weak interaction that was detected in CDK2 39kDa bait-CNTD1<sup>Q</sup> prey but not CDK2 39kDa prey-CNTD1<sup>Q</sup> bait combinations. Note that the deleted amino acids were replaced by the GGSGSG linker sequence in the Δ48-180 and Δ119-180 CNTD1 variants.

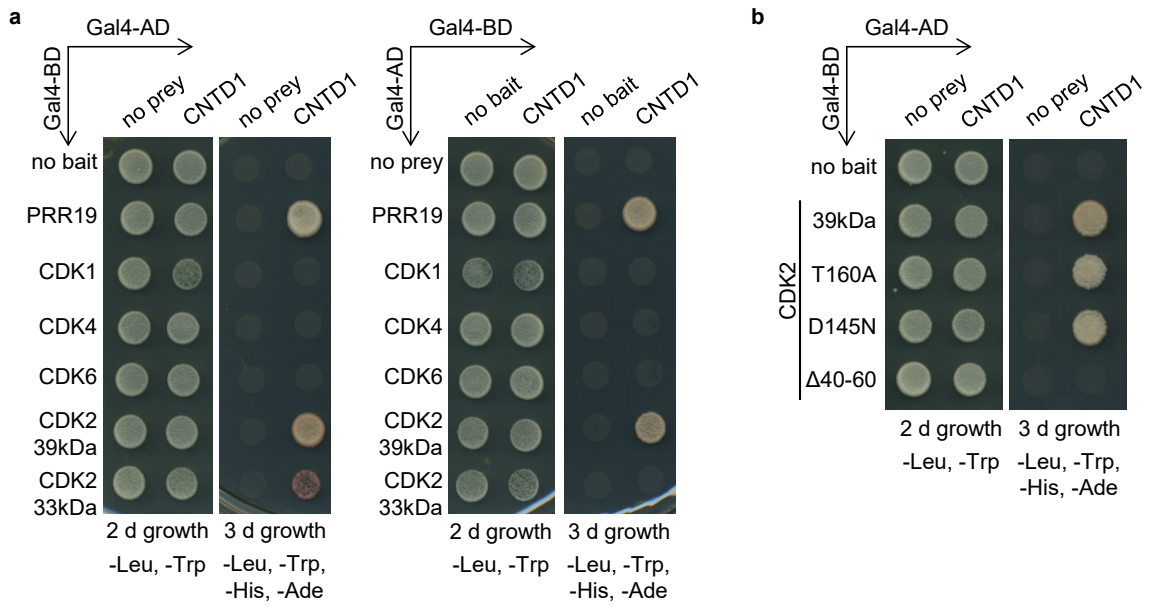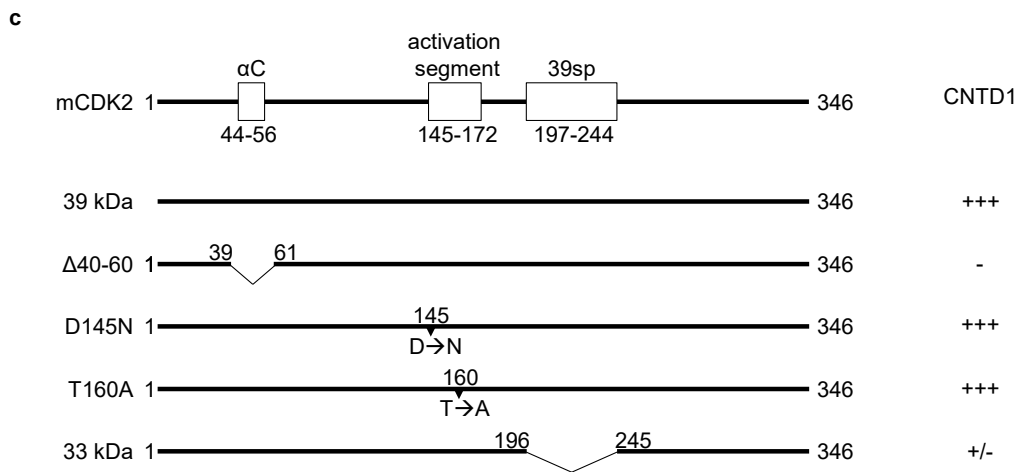

**Supplementary Figure 14. Y2H interactions between CNTD1 and full length cell-cycle regulating CDKs and altered versions of CDK2.**

(a and b) Y2H assays testing interactions between CNTD1 and wild type versions of various CDKs (a) or modified versions of CDK2 (b). T160A and D145N represent CDK2 versions where threonine was changed to alanine and aspartate was changed to asparagine in the 160<sup>th</sup> and 145<sup>th</sup> amino acid positions, respectively. Δ40-60 represents a CDK2 version where amino acids were deleted between the 39<sup>th</sup> and 61<sup>st</sup> positions. Yeast cell suspensions were plated onto dropout plates and imaged after 2 or 3 days of growth. As a negative control, interactions were tested between proteins of interest and either Gal4-binding (Gal4-BD) or Gal4-activation (Gal4-AD) domains that were not fused to bait (no bait) or prey (no prey) proteins, respectively. (c) Schematics of CDK2 domain structure. Boxes represent the PSTAIRE alpha helix (αC), the activation segment (act) and the region that is specific to the 39 kDa form of CDK2 (39sp). Numbers represent amino acid positions. Lines below the schematics of CDK2 structures represent CDK2 variants that were tested in Y2H for interaction with full length CNTD1 as shown in a and b. Strength of Y2H interactions is graded from no interaction (-) to strong interaction (+++), (+/-) indicates a weak interaction that was detected in CDK2 33kDa bait-CNTD1 prey but not CDK2 33kDa prey-CNTD1 bait combinations.

| Genotype                    | Epithelial cycle stage | Total number of tubules | Number of pachytene/diplotene spermatocytes per tubule |       |     |   | Number of cleaved-PARP-positive pachytene/diplotene spermatocytes per tubule |       |     |    |
|-----------------------------|------------------------|-------------------------|--------------------------------------------------------|-------|-----|---|------------------------------------------------------------------------------|-------|-----|----|
|                             |                        |                         | >20                                                    | 10-20 | 1-9 | 0 | >20                                                                          | 10-20 | 1-9 | 0  |
| <i>Prr19</i> <sup>+/+</sup> | I-IV                   | 75                      | 75                                                     | 0     | 0   | 0 | 0                                                                            | 0     | 0   | 75 |
|                             | V-VI                   | 35                      | 35                                                     | 0     | 0   | 0 | 0                                                                            | 0     | 1   | 34 |
|                             | VII-VIII               | 47                      | 47                                                     | 0     | 0   | 0 | 0                                                                            | 0     | 1   | 46 |
|                             | IX                     | 29                      | 29                                                     | 0     | 0   | 0 | 0                                                                            | 0     | 2   | 27 |
|                             | X-XII                  | 65                      | 65                                                     | 0     | 0   | 0 | 0                                                                            | 0     | 1   | 64 |
| <i>Prr19</i> <sup>-/-</sup> | I-IV                   | 37                      | 37                                                     | 0     | 0   | 0 | 0                                                                            | 0     | 0   | 37 |
|                             | V-VI                   | 26                      | 23                                                     | 3     | 0   | 0 | 2                                                                            | 7     | 10  | 7  |
|                             | VII-VIII               | 67                      | 10                                                     | 29    | 27  | 1 | 5                                                                            | 21    | 39  | 2  |
|                             | IX                     | 38                      | 0                                                      | 7     | 25  | 6 | 0                                                                            | 5     | 27  | 6  |
|                             | X-XII                  | 45                      | 0                                                      | 1     | 41  | 3 | 0                                                                            | 0     | 36  | 9  |

**Supplementary Table 1. Quantification of total or cleaved-PARP-positive cell numbers in the second luminal layer of spermatocytes in seminiferous tubules of adult *Prr19*<sup>+/+</sup> and *Prr19*<sup>-/-</sup> mice.**

The second column indicates the epithelial cycle stage of seminiferous tubules in which spermatocytes were quantified. Column 3 shows total numbers of inspected seminiferous tubules at the indicated epithelial cycle stages in testes of two mice of each genotype. Columns 4-7 show the numbers of seminiferous tubules that had more than 20, 10-20, 1-9 or no pachytene or diplotene spermatocytes in the second luminal layer. Columns 8-11 refer to the same analysed seminiferous tubules and show the numbers of seminiferous tubules that had more than 20, 10-20, 1-9 or no cleaved-PARP-positive pachytene or diplotene cells in the second luminal layer of spermatocytes. Seminiferous tubules were staged based on immunofluorescence staining of histone H1t and chromatin morphology of spermatogenic cells as detected by DAPI staining in cryosections of testes (see Methods). Cleaved-PARP was detected by immunofluorescence.

| Antibody                                                        | Source                                | WB       | IF      | IP       |
|-----------------------------------------------------------------|---------------------------------------|----------|---------|----------|
| Gp anti-PRR19                                                   | This study, A. Tóth                   | 1:3000   | 1:1000  | 1.5/3 µg |
| Rb anti-PRR19                                                   | This study, A. Tóth                   | 1:1000   | 1:500   |          |
| Rb anti-CNTD1                                                   | This study, A. Tóth                   | 1:3000   | 1:500   |          |
| Gp anti-CNTD1                                                   | This study, A. Tóth                   |          |         | 3 µg     |
| Rb anti-histone H3                                              | Abcam, ab18521                        | 1:200000 |         |          |
| Mm anti-GAPDH monoclonal (6C5)                                  | Santa Cruz, sc-32233                  | 1:1000   |         |          |
| Mm anti-α-tubulin monoclonal (DM1A)                             | Sigma, T6199                          | 1:500    |         |          |
| Gp IgG isotype control                                          | NBP1-97036, Novus Biologicals         |          |         | 3 µg     |
| Mm anti-CDK2 monoclonal (D-12)                                  | Santa Cruz, sc-6248                   | 1:500    | 1:200   |          |
| Mm anti-CCNB1IP1 (HE110) monoclonal (4H3)                       | Abcam, ab118999                       | 1:1000   | 1:150   |          |
| Mm anti-SYCP3 monoclonal                                        | Gift from R. Jessberger <sup>82</sup> |          | 1:2     |          |
| Ch anti-SYCP3                                                   | A. Tóth <sup>33</sup>                 |          | 1:600   |          |
| Rb anti-H1t                                                     | A. Tóth <sup>34</sup>                 |          | 1:20000 |          |
| Gp anti-H1t                                                     | A. Tóth <sup>34</sup>                 |          | 1:20000 |          |
| Gp anti-H1t                                                     | Gift from M. A. Handel <sup>36</sup>  |          | 1:500   |          |
| Mm anti-MLH1 monoclonal (4C9C7)                                 | Cell Signaling, #3515                 |          | 1:50    |          |
| Rb anti-MLH1                                                    | Calbiochem, PC56                      |          | 1:50    |          |
| Rb anti-cleaved PARP                                            | Cell Signaling, #9544S                |          | 1:250   |          |
| Ch anti-SYCP1                                                   | A. Tóth <sup>34</sup>                 |          | 1:300   |          |
| Rb anti-MLH3                                                    | Gift from P. Cohen <sup>12</sup>      |          | 1:1000  |          |
| Mm anti-γH2AX monoclonal (JBW301)                               | Millipore, #05-636                    |          | 1:6000  |          |
| Rat anti-RPA32/RPA2 monoclonal (4E4)                            | NEB, #2208                            |          | 1:100   |          |
| Rb anti-DMC1                                                    | Santa Cruz, sc-22768                  |          | 1:200   |          |
| Mm anti-RAD51 monoclonal (51RAD01 (3C10))                       | Thermo Fisher, MA5-14419              |          | 1:200   |          |
| Rb anti-MSH4                                                    | Abcam, ab58666                        |          | 1:200   |          |
| Gp anti-RNF212                                                  | N. Hunter <sup>20</sup>               |          | 1:50    |          |
| Goat anti-RNF212                                                | This study, N.Hunter                  |          | 1:100   |          |
| Mm anti-mono- and polyubiquitinated conjugates monoclonal (FK2) | Enzo Life Sciences, BML-PW8810-0100   |          | 1:500   |          |
| Rb anti-proteasome 20S alpha+beta                               | Abcam, ab22673                        |          | 1:200   |          |
| Rb anti-DDX4/MVH                                                | Abcam, ab13840                        |          | 1:500   |          |
| Mm anti-p63 monoclonal (4A4)                                    | Biocare Medical, CM163A               |          | 1:300   |          |

**Supplementary Table 2. List of primary antibodies.**

Primary antibodies (the first column), their source (the second column) and dilution used for immunoblotting (WB, the third column), immunofluorescence staining (IF, the fourth column) or immunoprecipitation (IP, the fifth column). Gp, guinea pig; Rb, rabbit; Mm, mouse; Ch, chicken.

| Antibody                                                   | Source                              | WB      | IF    |
|------------------------------------------------------------|-------------------------------------|---------|-------|
| HRP goat anti-mouse                                        | Jackson Immunoresearch, 115-035-166 | 1:10000 |       |
| HRP goat anti-rabbit                                       | Jackson Immunoresearch, 111-035-144 | 1:10000 |       |
| HRP goat anti-guinea pig                                   | Jackson Immunoresearch 106-035-003  | 1:10000 |       |
| HRP mouse monoclonal anti-rabbit IgG, light chain specific | Jackson Immunoresearch 211-032-171  | 1:10000 |       |
| Alexa Fluor® 405 goat anti-mouse                           | Invitrogen, A31553                  |         | 1:400 |
| Alexa Fluor® 405 goat anti-rabbit                          | Invitrogen, A31556                  |         | 1:400 |
| Alexa Fluor® 405 goat anti-chicken                         | Abcam, ab175675                     |         | 1:400 |
| Alexa Fluor® 488 goat anti-guinea pig                      | Invitrogen, A11073                  |         | 1:600 |
| Alexa Fluor® 488 goat anti-mouse                           | Invitrogen, A11029                  |         | 1:600 |
| Alexa Fluor® 488 goat anti-rabbit                          | Invitrogen, A11034                  |         | 1:600 |
| Alexa Fluor® 488 goat anti-rat                             | Life Technologies, 11006            |         | 1:600 |
| Alexa Fluor® 488 goat anti-chicken                         | Invitrogen, A11039                  |         | 1:600 |
| Alexa Fluor® 488 donkey anti-goat                          | Invitrogen, A11055                  |         | 1:600 |
| Alexa Fluor® 568 goat anti-chicken                         | Invitrogen, A11041                  |         | 1:600 |
| Alexa Fluor® 568 goat anti-rabbit                          | Invitrogen, A11036                  |         | 1:600 |
| Alexa Fluor® 568 goat anti-guinea pig                      | Invitrogen, A11075                  |         | 1:600 |
| Alexa Fluor® 568 goat anti-mouse                           | Invitrogen, A11031                  |         | 1:600 |
| Alexa Fluor® 568 donkey anti-mouse                         | Invitrogen, A10037                  |         | 1:600 |
| DyLight™ 405 donkey anti-guinea pig                        | Jackson Immunoresearch, 706-475-148 |         | 1:200 |

**Supplementary Table 3. List of secondary antibodies.**

Secondary antibodies (the first column), their source (the second column) and dilution used for immunoblotting (WB, the third column) or immunofluorescence staining (IF, the fourth column).



| Name                                 | Sequence (5'-to-3')                                                                     | Purpose                                                                                                                              |
|--------------------------------------|-----------------------------------------------------------------------------------------|--------------------------------------------------------------------------------------------------------------------------------------|
| <b>Primers used to produce gRNAs</b> |                                                                                         |                                                                                                                                      |
| Prr19_14nrvtop                       | TAGGAGGATCCTGACGGGCCAA                                                                  | cloning gRNA<br>Prr19_14nrvtop for<br>CRISPR/Cas9nickase<br>(D10A) targeting of<br>Prr19                                             |
| Prr19_14nrvbot                       | AAACTTGGCCCGTCAGGATCCT                                                                  |                                                                                                                                      |
| Prr19_14nfwtop                       | TAGGATCCATGTGTGATCCTCC                                                                  | cloning gRNA<br>Prr19_14nfw for<br>CRISPR/Cas9nickase<br>(D10A) targeting of<br>Prr19                                                |
| Prr19_14nfwbot                       | AAACGGAGGATCACACATGGAT                                                                  |                                                                                                                                      |
| DR274_F                              | AAATGGTCAGTATTGAGCCTCAG                                                                 | to amplify template for<br>IVT to produce gRNA                                                                                       |
| DR274_R                              | AAAAGCACCGACTCGGTGCCAC                                                                  |                                                                                                                                      |
| Cntd1_gRNA#1                         | GAAATTAATACGACTCACTATAGGTTTCAGGGAGACCCGG<br>ATCGTGTTTTAGAGCTAGAAATAGC                   | to produce template for<br><i>Cntd1_gRNA</i> #1 without<br>cloning                                                                   |
| gRNA_CRISPR_rv                       | AAAAGCACCGACTCGGTGCCACTTTTTCAAGTTGATAAC<br>GGACTAGCCTTATTTAACTTGCTATTTCTAGCTCTAAAA<br>C | universal primer to<br>produce template for<br>gRNA without cloning                                                                  |
| cntd1#1_Mlul_A                       | AAACCTGACTCCCCACTCTGCATCCACACCTACTATACG<br>CGTCTCCCTGA                                  | single-stranded DNA<br>oligo used as a<br>template for homology-<br>driven recombination                                             |
| cntd1#1_Mlul_A2                      | CCTGACTCCCCACTCTGCATCCACACCCACTATACGCGT<br>TCCCTGAAGC                                   | single-stranded DNA<br>oligo used as a<br>template for homology-<br>driven recombination                                             |
| <b>Primers used to genotype mice</b> |                                                                                         |                                                                                                                                      |
| Prr19gen_fw                          | GCACCACAAGGACTGGCTATTGTC                                                                | genotyping of F0<br>animals, <i>Prr19</i> <sup>+</sup> ,<br><i>Prr19</i> <sup>Mut1</sup> and <i>Prr19</i> <sup>Mut2</sup><br>alleles |
| Prr19gen_rv                          | GAGTTGGTACTGCAACTCCTCCAG                                                                |                                                                                                                                      |
| Cntd1gen_fw                          | CGAAGCGAGGGCAAACATAT                                                                    | genotyping of F0<br>animals, <i>Cntd1</i> <sup>+</sup> and<br><i>Cntd1</i> <sup>Q</sup> alleles                                      |
| Cntd1gen_rv                          | CATCTGTCAATTCCAGGCCAG                                                                   |                                                                                                                                      |
| Cntd1rv_WT                           | CTGCATCCACACCCACGAT                                                                     | genotyping of <i>Cntd1</i> <sup>+</sup><br>and <i>Cntd1</i> <sup>Q</sup> alleles (in<br>combination with<br>Cntd1gen_fw)             |
| Cntd1rv_mut                          | CTGCATCCACACCCACGAA                                                                     |                                                                                                                                      |
| Rnf212 exon<br>forward               | CGCTGGAATGAACGCAGGCGC                                                                   | genotyping of <i>Rnf212</i> <sup>+</sup><br>allele                                                                                   |
| Rnf212 exon<br>reverse               | CAGGGGAGTGAAGCCACGGTC                                                                   |                                                                                                                                      |
| pH530                                | TCCATGGGCTTAAACCAGTGC                                                                   | genotyping of <i>Rnf212</i> <sup>-</sup><br>allele                                                                                   |
| VM3                                  | GCGCATGCTCCAGACTGCCTTG                                                                  | genotyping of <i>Mlh3</i> <sup>+</sup> and<br><i>Mlh3</i> <sup>-</sup> alleles                                                       |
| Mlh3                                 | CGGTTTCCACCTTCTCTACATCGTCC                                                              |                                                                                                                                      |
| Bkos                                 | TTGGGTAACGCCAGGGTTTTCCAGTC                                                              |                                                                                                                                      |
| Ckos                                 | TCAGAGAAGGAAGCCAGTGTCTGCCAC                                                             |                                                                                                                                      |
| mHei10atg                            | ATGTCTTTGTGTGAAGACATGCTGCT                                                              |                                                                                                                                      |
| mei4GenotypeRe<br>vWT                | CCCAGCCCCTAGGCACTCAC                                                                    | genotyping of <i>Hei10</i> <sup>+</sup><br>and <i>Hei10</i> <sup>mei4</sup> alleles                                                  |
| mei4GenotypeRe<br>vMT                | CCCAGCCCCTAGGCACTCAA                                                                    |                                                                                                                                      |
| SP16R                                | ATGTTAGTCGGCACAGCAGTAG                                                                  | genotyping of <i>Spo11</i> <sup>+</sup><br>and <i>Spo11</i> <sup>-</sup> alleles                                                     |
| SP15F                                | TGAGATACATGGAGGAAGATGG                                                                  |                                                                                                                                      |
| PRSF2                                | CTGAGCCCAGAAAGCGAAGGAA                                                                  |                                                                                                                                      |

|                                 |                                           |                                                                                  |                                           |
|---------------------------------|-------------------------------------------|----------------------------------------------------------------------------------|-------------------------------------------|
| Sycp1 exon for                  | TCAGAGCCAATGAGCAGACTGTATTC                | genotyping of <i>Sycp1</i> <sup>+</sup> allele                                   |                                           |
| Sycp1 exon rev                  | CTGAAGTTCTGAATGGCTTTTCGC                  |                                                                                  |                                           |
| SYCP1 Neo1 Forward              | GACCTGTCCGGTGCCCTGAATG                    | genotyping of <i>Sycp1</i> <sup>-</sup> allele                                   |                                           |
| SYCP1 Neo9 Reverse              | GATGGCTGGCAACTAGAAGG                      |                                                                                  |                                           |
| MLH1-a                          | AGGAGCTGATGCTGAGGC                        | genotyping <i>Mlh1</i> <sup>+</sup> and <i>Mlh1</i> <sup>Lisk</sup> alleles      |                                           |
| MLH1-U                          | TTTCATCTTGTCACCCGATG                      |                                                                                  |                                           |
| MLH1-T5                         | GATCTCGACGGTATCGATAAGC                    |                                                                                  |                                           |
| <b>Primers used for RT-PCR</b>  |                                           |                                                                                  |                                           |
| Prr19_exon1_fw                  | GAGGCTTGGGGTCTCTAC                        | RT-PCR of <i>Mm Prr19</i>                                                        |                                           |
| Prr19_exon2_rv                  | CGGTGCTCCCGGCTCAAC                        |                                                                                  |                                           |
| Cntd1_exon1_fw                  | ATGAATATGGAAGGACCCTTGAGG                  | RT-PCR of <i>Mm Cntd1</i>                                                        |                                           |
| Cntd1_exon2_rv                  | CTACAGCCTGGTAGCTCACC                      |                                                                                  |                                           |
| Rps9_fw                         | GGCCAAATCTATTCACCATGC                     | RT-PCR of <i>Mm Rsp9</i>                                                         |                                           |
| Rps9_rv                         | TAATCCTCTTCCTCATCATCAC                    |                                                                                  |                                           |
| <b>Primers used for cloning</b> |                                           |                                                                                  |                                           |
| Prr19 2.Fw                      | CACCTTACAGGGCTGCCATGGCT                   | to clone PRR19 fragment Thr183-Tyr366 for antigen preparation                    |                                           |
| Prr19 2.Rv                      | TCAGTACAGTCTCATTGGGGG                     |                                                                                  |                                           |
| Cntd1fr2_LICfw                  | ATCACCACCACCACAGTGGCTGTCTGACCCTCCTCGAC C  | to clone CNTD1 fragment Cys126-Thr249 for antigen preparation                    |                                           |
| Cntd1_LICrv                     | TGAGGAGAAGGCGCGTTATCACGTGTTAGAGGAAGCGG    |                                                                                  |                                           |
| Prr19_ORFstart                  | ATGGACCCTCGGGGAC                          | to amplify Prr19 from cDNA from mouse testis                                     |                                           |
| Prr19_ORFend                    | TCAGTACAGTCTCATTGG                        |                                                                                  |                                           |
| Prr19_1-366_BamHI_fw            | GAATTCGGGGGATCATGGACCCTCGGGGACCA          | to clone Prr19 full length and Prr19 fragments into vectors for yeast-two hybrid |                                           |
| Prr19_1-366_NdeI_rv             | GTAGCAGCACCCATATCAGTACAGTCTCATTGGG        |                                                                                  |                                           |
| Prr19_1-217_NdeI_rv             | GTAGCAGCACCCATATCACCTCTGTCTCTCAGGGAC      |                                                                                  |                                           |
| Prr19_1-145_EcoRI_fw            | TACCGCGGCCGAATTCATGGACCCTCGGGGACCA        |                                                                                  |                                           |
| Prr19_1-145_BamHI_rv            | GCAGGTCGACGGATCCTCATGGAGAATTTGGTGGGCCT    |                                                                                  |                                           |
| Prr19_40-145_EcoRI_fw           | TACCGCGGCCGAATTCATGTTGGCCCGTCAGGATCC      |                                                                                  |                                           |
| Prr19_100-217_EcoRI_fw          | TACCGCGGCCGAATTCATGGCCTTGAATCACATACCCC    |                                                                                  |                                           |
| Prr19_100-217_BamHI_rv          | GCAGGTCGACGGATCCTCACCTCTGTCTCTCAGGGACC    |                                                                                  |                                           |
| Prr19_145-217_EcoRI_fw          | TACCGCGGCCGAATTCATGCCAGATCTTCTGTGTTGGG    |                                                                                  |                                           |
| Prr19_218-366_BamHI_fw          | GAATTCGGGGGATCATGGCATCTTCTTGATGGAAG       |                                                                                  |                                           |
| Prr19_218-353_EcoRI_fw          | TACCGCGGCCGAATTCATGGCATCTTCTTGATGGAAGT TC |                                                                                  |                                           |
| Prr19_218-353_BamHI_rv          | GCAGGTCGACGGATCCTCAGCTCTGAGTTACTACCCAG G  |                                                                                  |                                           |
| Cntd1_1-334_EcoRI_fw            | TACCGCGGCCGAATTCATGAATATGGAAGGACCCTT      |                                                                                  | to clone Cntd1 full length, fragments and |

|                         |                                                     |                                                                         |
|-------------------------|-----------------------------------------------------|-------------------------------------------------------------------------|
| Cntd1_1-334_BamHI_rv    | GCAGGTCGACGGATCCTCACGTGTTAGAGGAAGCG                 | mutants into vectors for yeast-two hybrid                               |
| Cntd1_del1-48_EcoRI_fw  | TACCGCGGCCGAATTCATGACGGGCAGCTTCAGGGAG               |                                                                         |
| Cntd1_48-180del_fr1_rv  | ACCTGATCCAGAGCCACCTCCCCGAGCCTCCTTCA                 |                                                                         |
| Cntd1_119-180del_fr2_fw | GGTGGCTCTGGATCAGGTCTGCCACTCCTCTGGCAT                |                                                                         |
| Cntd1_119-180del_fr1_rv | ACCTGATCCAGAGCCACCAAGCTGCTCTTTCATAGC                |                                                                         |
| Cntd1_1-180aa_BamHI_rv  | GCAGGTCGACGGATCCTCAATTTATTTGGAAGTTCAGGG<br>AC       |                                                                         |
| Cntd1_mutQ_rv           | AACTGCGTTTCCCTGAAGCTGCCCGTC                         |                                                                         |
| Cntd1_mutQ_fw           | CAGGGAAACGCAGTTTGTCTCTCCTGTCTGAACA                  |                                                                         |
| Hei10_EcoRI_fw          | TACCGCGGCCGAATTCATGTCTTTGTGTGAAGACATG               | to clone Hei10 full length into vectors for yeast two-hybrid            |
| Hei10_BamHI_rv          | GCAGGTCGACGGATCCCTAAATCTTTTTGCTTTAAAGG              |                                                                         |
| cdk2_fw_EcoRI           | TACCGCGGCCGAATTCATGGAGAATTCCAAAAGGTG                | to clone Cdk2 full length and mutants into vectors for yeast-two hybrid |
| cdk2_rv_BamHI           | GCAGGTCGACGGATCCTCAGAGCCGAAGGTGGG                   |                                                                         |
| mCDK2short_fr1_rv       | TGCGGGTCACCATTTAGCAAAGATGCAGCCCA                    |                                                                         |
| mCDK2short_fr2_fw       | TGCTGAAATGGTGACCCGCAGGGCCCTATTCC                    |                                                                         |
| mCDK2_del40-60aa_fr1_rv | CGATATTAGGAGTGTGAGCCGGATCTTCTT                      |                                                                         |
| mCDK2_del40-60aa_fr2_fw | GCTCGACACTCCTAATATCGTCAAGCTGCTGG                    |                                                                         |
| Cdk2-D145N-fr1-rv       | CTCTTGCTAGTCCAAAGTTTGCCAGCTTGATGG                   |                                                                         |
| Cdk2-D145N-fr2-fw       | AACTTTGGACTAGCAAGAGCCTTTGGAGTCCC                    |                                                                         |
| Cdk2-T160A-fr1-rv       | GGGTCACCACCTCATGAGCGTAAGTTCGGACAG                   |                                                                         |
| Cdk2-T160A-fr2-fw       | CGCTCATGAGGTGGTGACCCTGTGGTACCG                      |                                                                         |
| Cdk1_fw_EcoRI           | TACCGCGGCCGAATTCATGGAAGACTATATCAAAATAGA<br>GAAAATTG | to clone Cdk1 into vectors for yeast-two hybrid                         |
| Cdk1_rv_BamHI           | GCAGGTCGACGGATCCCTACATCTTCTTAATCTGATTGT<br>CCAAG    |                                                                         |
| Cdk4-FL_FW_EcoRI        | TACCGCGGCCGAATTCATGGCTGCCACTCGATATGAAC<br>C         | to clone Cdk4 into vectors for yeast-two hybrid                         |
| Cdk4-FL_RV_BamHI        | GCAGGTCGACGGATCCTCACTCTGCGTCGCTTTCC                 |                                                                         |
| Cdk6-FL_FW_EcoRI        | TACCGCGGCCGAATTCATGGAGAAGGACAGCCTGAGTC<br>G         | to clone 6ast-two hybrid                                                |
| Cdk6-FL_RV_BamHI        | GCAGGTCGACGGATCCTCAGGCTGTGTTTCAGCTCCG               |                                                                         |

**Supplementary Table 4. List of primers.**

The table lists primers used in the study: primer names (the first column), 5'-to-3' primer sequences (the second column) and the purpose to which primers were used (the third column).

## Supplementary Methods

### R code for statistical analysis.

**Mann-Whitney U test** (used in Fig. 1g, j, 3a, e, 4d, f, h, 5d, f, h, 6c-d, h, 7d and Supplementary Fig. 5d-e, 7b, 8b-c, 9b, d, 10b):

```
library(lmerTest)
library(xlsx)

dat <- read.xlsx("your file.xlsx",1)
wilcox.test(dat[[1]], dat[[2]], paired = FALSE)
```

**Analysis of deviance using the likelihood-ratio test based on the chi-squared distribution** (used in Fig. 3b, 5b and Supplementary Fig. 4g-h, 6a-b, d):

```
## Download the R-package which can be used to fit models with random effects:
library(lmerTest)
library(xlsx)
## Download the data
dat <- read.xlsx("your file name.xlsx",1)
##below is example table format
my.data.example <- data.frame(expand.grid(
  Level = c("a", "b" , "c"),
  Experiment=c("1", "2"),
  Type = c("wt", "ko")) )

my.data.example$Y1 <-c(155, 79,11,143,52,65,16,206,55,222,19,91)
my.data.example

## Look at the data:
dat
## The analysis of the data in the column Y1 is now explained in detail:
## In order to test the interaction between Type and Level,
## two models are fit. In the first model, the interaction is present:
model.1.1 <- glmer(Y1 ~ Type + Level + Type*Level + (1|Experiment),family =
poisson, data=dat)
## To see the summary of the model fit:
summary(model.1.1)
## In the second model, the interaction term is not included
model.1.2 <- glmer(Y1 ~ Type + Level + (1|Experiment),family = poisson, data=dat)
## To see the summary of the model fit:
summary(model.1.2)
## The two models are now compared using the anova() command:
anova(model.1.1,model.1.2)
## This command compares the model fit using the likelihood-ratio test.
## Because the p-value of the likelihood ratio test is less than 5%, we
## conclude that the data provide evidence that the interaction is significant.
## Therefore, we have evidence rgar the distributions of Level are different
## between the two types (wt and ko).
```



**One sample t-test** (used in Fig. 6j, 7g):

```
library(lmerTest)
library(xlsx)

dat <- read.xlsx("your file.xlsx",1)
t.test(dat[[1]], alternative = "g", mu=20)
```

**Fisher's exact test** (used in Fig. 6a and Supplementary Fig. 5b-c):

```
dat <- dat <- read.xlsx("your file.xlsx",1)
dat

##below is example table format

my.data.example <- data.frame(expand.grid(
  Level = c("a", "b", "c"),
  Experiment=c("1"),
  Type = c("wt", "ko"))) )

my.data.example$count <-c(59, 75, 14, 35, 21, 51)

my.data.example

##

F1 <- xtabs(my.data.example$count ~ my.data.example$Type + my.data.example$Level)
fisher.test(F1)
```
